# Supplementary material
Source: publisher site journal article supplement (https://www.dovepress.com/article/129183)
Supplement: Supplementary file 1 [file get_supplementary_file.php]

## **Questionnaire: The perception of educational value in clinical rotations (placements) at the University of Western Australia**

This study is to investigate the perceived value final year medical students have of their education in their clinical rotations in medical school. This is specifically to investigate clinical rotations that students would have encountered in their training.

We are interested in the educational and clinical activities that you believe have had a positive impact on your clinical performance. The results of this study could benefit both local and national medical curriculum developers in Australia in their planning for increasingly limited clinical placements for the large number of medical students now and in the future. This could provide the basis for further analysis and potential collaborations.

We shall be grateful if you could complete this questionnaire to the best of your knowledge. If you would like to make comments generally or specifically on an issue, please take the opportunity in the space towards the end of this questionnaire.

To respond in this questionnaire format:

1. Right click the relevant boxes.
2. Click properties.
3. Under default value, change to checked.
4. Click OK

## Part A. Background information

A1. Which Medical School are you in?

*Please tick one only*

|                                                                            |
|----------------------------------------------------------------------------|
| <input checked="" type="checkbox"/> <b>University of Western Australia</b> |
|----------------------------------------------------------------------------|

A2. What type of medical education is specific to you?

*Please tick one only*

|                                                                    |                                                                                |
|--------------------------------------------------------------------|--------------------------------------------------------------------------------|
| <input type="checkbox"/> <b>1. Undergraduate Medical Education</b> | <input type="checkbox"/> <b>2. Graduate in an Undergraduate Medical Course</b> |
|--------------------------------------------------------------------|--------------------------------------------------------------------------------|

A3. In which year will you graduate?

## Part B. Curriculum

B1. What was the **standard length** of your medical curriculum?

*Please tick one only*

|                                                   |                                                                                           |
|---------------------------------------------------|-------------------------------------------------------------------------------------------|
| <b>1.</b> <input type="checkbox"/> <b>4 years</b> | <b>2.</b> <input type="checkbox"/> <b>5 years</b>                                         |
| <b>3.</b> <input type="checkbox"/> <b>6 years</b> | <b>4.</b> <input type="checkbox"/> <b>7 years (with a separate research Honours year)</b> |

B2. What is the standard length of the following **phases** of your university studies? *Please tick as applicable (one answer per row)*

|                                                                                 | 0 years                  | 1 year                   | 2 years                  | 3 years                  | ≥4 years                 |
|---------------------------------------------------------------------------------|--------------------------|--------------------------|--------------------------|--------------------------|--------------------------|
| <b>Pre-medical phase (first qualification prior to entering medical school)</b> | <input type="checkbox"/> |
| <b>Pre-clinical phase (basic and pathological sciences only)</b>                | <input type="checkbox"/> |

|                                                                               |                          |                          |                          |                          |                          |
|-------------------------------------------------------------------------------|--------------------------|--------------------------|--------------------------|--------------------------|--------------------------|
| Clinical phase (tick here as well if you underwent a truly integrated course) | <input type="checkbox"/> |
|-------------------------------------------------------------------------------|--------------------------|--------------------------|--------------------------|--------------------------|--------------------------|

B3. How would you scale your overall **medical curriculum** for the following characteristics?

*Please tick the appropriate box that best describes the balance between each two differing characteristics. One answer per row.*

|                                                                            |                            |                            |                            |                            |                            |                           |
|----------------------------------------------------------------------------|----------------------------|----------------------------|----------------------------|----------------------------|----------------------------|---------------------------|
| <span style="margin: 0 20px;"><b>Where does your curriculum lie</b></span> |                            |                            |                            |                            |                            |                           |
| <b>Discipline-based subjects</b>                                           | <input type="checkbox"/> 1 | <input type="checkbox"/> 2 | <input type="checkbox"/> 3 | <input type="checkbox"/> 4 | <input type="checkbox"/> 5 | <b>Fully Integrated</b>   |
| <b>Subject-based learning</b>                                              | <input type="checkbox"/> 1 | <input type="checkbox"/> 2 | <input type="checkbox"/> 3 | <input type="checkbox"/> 4 | <input type="checkbox"/> 5 | <b>Problem/Case-based</b> |
| <b>Regional (e.g. head and neck, thorax, abdomen)</b>                      | <input type="checkbox"/> 1 | <input type="checkbox"/> 2 | <input type="checkbox"/> 3 | <input type="checkbox"/> 4 | <input type="checkbox"/> 5 | <b>System-base</b>        |
| <b>Tutor-led</b>                                                           | <input type="checkbox"/> 1 | <input type="checkbox"/> 2 | <input type="checkbox"/> 3 | <input type="checkbox"/> 4 | <input type="checkbox"/> 5 | <b>Self-directed</b>      |

B4. How would you rate the **degree of integration** of basic medical sciences and clinical sciences?

*Please tick one answer per row.*

|                               | <b>No integration</b>      | <b>Minimal integration</b> | <b>Moderate integration</b> | <b>Full integration</b>    |
|-------------------------------|----------------------------|----------------------------|-----------------------------|----------------------------|
| <b>Basic medical sciences</b> | <input type="checkbox"/> 1 | <input type="checkbox"/> 2 | <input type="checkbox"/> 3  | <input type="checkbox"/> 4 |
| <b>Clinical sciences</b>      | <input type="checkbox"/> 1 | <input type="checkbox"/> 2 | <input type="checkbox"/> 3  | <input type="checkbox"/> 4 |

## Part C: Clinical Rotations

C1. Did you spend time in a rural clinical school?

*Please tick one answer. If your answer is No, please go to C3.*

|                                        |                                       |
|----------------------------------------|---------------------------------------|
| 1. <input type="checkbox"/> <b>Yes</b> | 2. <input type="checkbox"/> <b>No</b> |
|----------------------------------------|---------------------------------------|

C2. How long did you spend in a rural clinical school?

*Please tick one answer.*

|                                                         |                                                       |
|---------------------------------------------------------|-------------------------------------------------------|
| 1. <input type="checkbox"/> <b>&lt; 1 academic year</b> | 2. <input type="checkbox"/> <b>1 academic year</b>    |
| 3. <input type="checkbox"/> <b>2 academic years</b>     | 4. <input type="checkbox"/> <b>≥ 3 academic years</b> |

C3. If you had both rural and metropolitan rotations in your clinical training, which did you consider to be more educationally useful to your clinical training?

Please tick one answer.

|                                   |                                          |
|-----------------------------------|------------------------------------------|
| 1. <input type="checkbox"/> Rural | 2. <input type="checkbox"/> Metropolitan |
| 3. <input type="checkbox"/> Both  | 4. <input type="checkbox"/> Neither      |

C4. Which of the following clinical placements did you find educationally useful to your clinical training? (tick all that apply and the level of usefulness)

|                                                                      | Not useful at all          | Rarely useful (<10% of the time) | Minimally useful (10%-30% of time) | Moderately useful (40%-80% of time) | Very useful (>80% of time) | Not applicable             |
|----------------------------------------------------------------------|----------------------------|----------------------------------|------------------------------------|-------------------------------------|----------------------------|----------------------------|
| 1. Metropolitan Hospital (Level 3) wards                             | <input type="checkbox"/> 1 | <input type="checkbox"/> 2       | <input type="checkbox"/> 3         | <input type="checkbox"/> 4          | <input type="checkbox"/> 5 | <input type="checkbox"/> 6 |
| 2. Metropolitan Hospital (Level 3) out-patient clinics               | <input type="checkbox"/> 1 | <input type="checkbox"/> 2       | <input type="checkbox"/> 3         | <input type="checkbox"/> 4          | <input type="checkbox"/> 5 | <input type="checkbox"/> 6 |
| 3. Allied health (e.g. physiotherapy, occupational therapy) sessions | <input type="checkbox"/> 1 | <input type="checkbox"/> 2       | <input type="checkbox"/> 3         | <input type="checkbox"/> 4          | <input type="checkbox"/> 5 | <input type="checkbox"/> 6 |
| 4. Metropolitan general practice                                     | <input type="checkbox"/> 1 | <input type="checkbox"/> 2       | <input type="checkbox"/> 3         | <input type="checkbox"/> 4          | <input type="checkbox"/> 5 | <input type="checkbox"/> 6 |
| 5. Rural general practice                                            | <input type="checkbox"/> 1 | <input type="checkbox"/> 2       | <input type="checkbox"/> 3         | <input type="checkbox"/> 4          | <input type="checkbox"/> 5 | <input type="checkbox"/> 6 |
| 6. Regional hospital (Level 1 and 2)                                 | <input type="checkbox"/> 1 | <input type="checkbox"/> 2       | <input type="checkbox"/> 3         | <input type="checkbox"/> 4          | <input type="checkbox"/> 5 | <input type="checkbox"/> 6 |
| 7. Nursing attachments e.g. to diabetes educator                     | <input type="checkbox"/> 1 | <input type="checkbox"/> 2       | <input type="checkbox"/> 3         | <input type="checkbox"/> 4          | <input type="checkbox"/> 5 | <input type="checkbox"/> 6 |
| 8. Community placements e.g. hospices, aged care homes               | <input type="checkbox"/> 1 | <input type="checkbox"/> 2       | <input type="checkbox"/> 3         | <input type="checkbox"/> 4          | <input type="checkbox"/> 5 | <input type="checkbox"/> 6 |
| 9. Private practice                                                  | <input type="checkbox"/> 1 | <input type="checkbox"/> 2       | <input type="checkbox"/> 3         | <input type="checkbox"/> 4          | <input type="checkbox"/> 5 | <input type="checkbox"/> 6 |

|                                         |           |                            |                            |                            |                            |                            |                            |
|-----------------------------------------|-----------|----------------------------|----------------------------|----------------------------|----------------------------|----------------------------|----------------------------|
| <b>Rooms</b>                            |           |                            |                            |                            |                            |                            |                            |
| <b>10. Indigenous health placements</b> |           | <input type="checkbox"/> 1 | <input type="checkbox"/> 2 | <input type="checkbox"/> 3 | <input type="checkbox"/> 4 | <input type="checkbox"/> 5 | <input type="checkbox"/> 6 |
| <b>Other Placements</b>                 | <b>1.</b> | <input type="checkbox"/> 1 | <input type="checkbox"/> 2 | <input type="checkbox"/> 3 | <input type="checkbox"/> 4 | <input type="checkbox"/> 5 | <input type="checkbox"/> 6 |
|                                         | <b>2.</b> | <input type="checkbox"/> 1 | <input type="checkbox"/> 2 | <input type="checkbox"/> 3 | <input type="checkbox"/> 4 | <input type="checkbox"/> 5 | <input type="checkbox"/> 6 |
|                                         | <b>3.</b> | <input type="checkbox"/> 1 | <input type="checkbox"/> 2 | <input type="checkbox"/> 3 | <input type="checkbox"/> 4 | <input type="checkbox"/> 5 | <input type="checkbox"/> 6 |

C5. Why did you find this venue/these venues educationally useful to your clinical training? (tick all that apply)

|                                                                                                 |                                                                                                                  |
|-------------------------------------------------------------------------------------------------|------------------------------------------------------------------------------------------------------------------|
| 1. <input type="checkbox"/> High level of supervision in training                               | 2. <input type="checkbox"/> Amount of formal bed-side teaching/teaching ward rounds                              |
| 3. <input type="checkbox"/> Amount of clinical tutorials with and without patients              | 4. <input type="checkbox"/> Centralised medical/clinical school sessions to consolidate learning                 |
| 5. <input type="checkbox"/> Amount of patient contact                                           | 6. <input type="checkbox"/> Variety of patient presentations                                                     |
| 7. <input type="checkbox"/> Being part of a clinical team                                       | 8. <input type="checkbox"/> Frequent formative assessments e.g. Mini-CEX, case reports                           |
| 9. <input type="checkbox"/> Opportunity to ask questions and receive useful information         | 10. <input type="checkbox"/> Regular feedback on progress in the clinical arena                                  |
| 11. <input type="checkbox"/> Working with junior doctors e.g. interns                           | 12. <input type="checkbox"/> Being on call with team to admit acute patients                                     |
| 13. <input type="checkbox"/> Having peers to work with and share information/experiences        | 14. <input type="checkbox"/> Having junior students to mentor and consolidate learning                           |
| 15. <input type="checkbox"/> Having good information services support including on-site library | 16. <input type="checkbox"/> Having access to patient information on the site (laboratory and radiology results) |

C6. Which of the following clinical placements did you find **most** educationally useful to your clinical training? (tick the **most** useful only)

|                                                                                               |                                                                                 |
|-----------------------------------------------------------------------------------------------|---------------------------------------------------------------------------------|
| 1. <input type="checkbox"/> Metropolitan Hospital (Level 3) wards                             | 2. <input type="checkbox"/> Metropolitan Hospital (Level 3) out-patient clinics |
| 3. <input type="checkbox"/> Allied health (e.g. physiotherapy, occupational therapy) sessions | 4. <input type="checkbox"/> Metropolitan general practice                       |
| 5. <input type="checkbox"/> Rural general practice                                            | 6. <input type="checkbox"/> Regional hospital (Level 1 and 2)                   |
| 7. <input type="checkbox"/> Nursing attachments e.g. to diabetes educator                     | 8. <input type="checkbox"/> Community placements e.g. hospices, aged care homes |
| 9. <input type="checkbox"/> Private practice Rooms                                            | 10. <input type="checkbox"/> Indigenous health placement                        |
| 11. <input type="checkbox"/> Other placements                                                 | 12. <input type="checkbox"/> Other placements                                   |

|           |           |
|-----------|-----------|
| e.g. .... | e.g. .... |
|-----------|-----------|

C7. Why did you find this venue the **most** educationally useful to your clinical training? (tick all that apply)

|                                                                                                 |                                                                                                                  |
|-------------------------------------------------------------------------------------------------|------------------------------------------------------------------------------------------------------------------|
| 1. <input type="checkbox"/> High level of supervision in training                               | 2. <input type="checkbox"/> Amount of formal bed-side teaching/teaching ward rounds                              |
| 3. <input type="checkbox"/> Amount of clinical tutorials with and without patients              | 4. <input type="checkbox"/> Centralised medical/clinical school sessions to consolidate learning                 |
| 5. <input type="checkbox"/> Amount of patient contact                                           | 6. <input type="checkbox"/> Variety of patient presentations                                                     |
| 7. <input type="checkbox"/> Being part of a clinical team                                       | 8. <input type="checkbox"/> Frequent formative assessments e.g. Mini-CEX, case reports                           |
| 9. <input type="checkbox"/> Opportunity to ask questions and receive useful information         | 10. <input type="checkbox"/> Regular feedback on progress in the clinical arena                                  |
| 11. <input type="checkbox"/> Working with junior doctors e.g. interns                           | 12. <input type="checkbox"/> Being on call with team to admit acute patients                                     |
| 13. <input type="checkbox"/> Having peers to work with and share information/experiences        | 14. <input type="checkbox"/> Having junior students to mentor and consolidate learning                           |
| 15. <input type="checkbox"/> Having good information services support including on-site library | 16. <input type="checkbox"/> Having access to patient information on the site (laboratory and radiology results) |

|                                        |
|----------------------------------------|
| <b>Part D. Teaching and assessment</b> |
|----------------------------------------|

D1. In your clinical rotations, how frequently were you given the opportunity to:

*Please tick as applicable*

|                                                     | Never                      | Rarely                     | Some weeks                 | Most weeks                 | All year                   |
|-----------------------------------------------------|----------------------------|----------------------------|----------------------------|----------------------------|----------------------------|
| Present acute patients to a senior doctor           | <input type="checkbox"/> 1 | <input type="checkbox"/> 2 | <input type="checkbox"/> 3 | <input type="checkbox"/> 4 | <input type="checkbox"/> 5 |
| Report daily on your allocated patients' progress   | <input type="checkbox"/> 1 | <input type="checkbox"/> 2 | <input type="checkbox"/> 3 | <input type="checkbox"/> 4 | <input type="checkbox"/> 5 |
| Participate in teaching ward rounds                 | <input type="checkbox"/> 1 | <input type="checkbox"/> 2 | <input type="checkbox"/> 3 | <input type="checkbox"/> 4 | <input type="checkbox"/> 5 |
| Attend intern training sessions                     | <input type="checkbox"/> 1 | <input type="checkbox"/> 2 | <input type="checkbox"/> 3 | <input type="checkbox"/> 4 | <input type="checkbox"/> 5 |
| Attend resident training sessions                   | <input type="checkbox"/> 1 | <input type="checkbox"/> 2 | <input type="checkbox"/> 3 | <input type="checkbox"/> 4 | <input type="checkbox"/> 5 |
| Attend postgraduate sessions including Grand Rounds | <input type="checkbox"/> 1 | <input type="checkbox"/> 2 | <input type="checkbox"/> 3 | <input type="checkbox"/> 4 | <input type="checkbox"/> 5 |

|                                                                    |    |                            |                            |                            |                            |                            |
|--------------------------------------------------------------------|----|----------------------------|----------------------------|----------------------------|----------------------------|----------------------------|
| Review specifically prepared on-line cases to consolidate learning |    | <input type="checkbox"/> 1 | <input type="checkbox"/> 2 | <input type="checkbox"/> 3 | <input type="checkbox"/> 4 | <input type="checkbox"/> 5 |
| Participate in learning blogs supervised by a clinician            |    | <input type="checkbox"/> 1 | <input type="checkbox"/> 2 | <input type="checkbox"/> 3 | <input type="checkbox"/> 4 | <input type="checkbox"/> 5 |
| Participate in learning blogs with other students only             |    | <input type="checkbox"/> 1 | <input type="checkbox"/> 2 | <input type="checkbox"/> 3 | <input type="checkbox"/> 4 | <input type="checkbox"/> 5 |
| Participate in a dedicated facebook page for learning issues       |    | <input type="checkbox"/> 1 | <input type="checkbox"/> 2 | <input type="checkbox"/> 3 | <input type="checkbox"/> 4 | <input type="checkbox"/> 5 |
| Others                                                             | 1. | <input type="checkbox"/> 1 | <input type="checkbox"/> 2 | <input type="checkbox"/> 3 | <input type="checkbox"/> 4 | <input type="checkbox"/> 5 |
|                                                                    | 2. | <input type="checkbox"/> 1 | <input type="checkbox"/> 2 | <input type="checkbox"/> 3 | <input type="checkbox"/> 4 | <input type="checkbox"/> 5 |
|                                                                    | 3. | <input type="checkbox"/> 1 | <input type="checkbox"/> 2 | <input type="checkbox"/> 3 | <input type="checkbox"/> 4 | <input type="checkbox"/> 5 |

D2. In your clinical rotations, of the activities that you participated in for at least half the academic year, how educationally useful were these activities to your clinical training? *Please tick as applicable*

|                                                                       | Not useful at all          | Rarely useful (<10% of the time) | Minimally useful (10%-30% of time) | Moderately useful (40%-80% of time) | Very useful (>80% of time) |                            |
|-----------------------------------------------------------------------|----------------------------|----------------------------------|------------------------------------|-------------------------------------|----------------------------|----------------------------|
| Presentation of acute patients you clerked to a senior doctor         | <input type="checkbox"/> 1 | <input type="checkbox"/> 2       | <input type="checkbox"/> 3         | <input type="checkbox"/> 4          | <input type="checkbox"/> 5 |                            |
| Daily reports on your allocated patients' progress                    | <input type="checkbox"/> 1 | <input type="checkbox"/> 2       | <input type="checkbox"/> 3         | <input type="checkbox"/> 4          | <input type="checkbox"/> 5 |                            |
| Participation in teaching ward rounds                                 | <input type="checkbox"/> 1 | <input type="checkbox"/> 2       | <input type="checkbox"/> 3         | <input type="checkbox"/> 4          | <input type="checkbox"/> 5 |                            |
| Attendance at intern training sessions                                | <input type="checkbox"/> 1 | <input type="checkbox"/> 2       | <input type="checkbox"/> 3         | <input type="checkbox"/> 4          | <input type="checkbox"/> 5 |                            |
| Attendance at resident training sessions                              | <input type="checkbox"/> 1 | <input type="checkbox"/> 2       | <input type="checkbox"/> 3         | <input type="checkbox"/> 4          | <input type="checkbox"/> 5 |                            |
| Attendance at postgraduate sessions including Grand Rounds            | <input type="checkbox"/> 1 | <input type="checkbox"/> 2       | <input type="checkbox"/> 3         | <input type="checkbox"/> 4          | <input type="checkbox"/> 5 |                            |
| Review of specifically prepared on-line cases to consolidate learning | <input type="checkbox"/> 1 | <input type="checkbox"/> 2       | <input type="checkbox"/> 3         | <input type="checkbox"/> 4          | <input type="checkbox"/> 5 |                            |
| Participation in learning blogs supervised by a clinician             | <input type="checkbox"/> 1 | <input type="checkbox"/> 2       | <input type="checkbox"/> 3         | <input type="checkbox"/> 4          | <input type="checkbox"/> 5 |                            |
| Participation in learning blogs with other students only              | <input type="checkbox"/> 1 | <input type="checkbox"/> 2       | <input type="checkbox"/> 3         | <input type="checkbox"/> 4          | <input type="checkbox"/> 5 |                            |
| Participation in a dedicated facebook page for learning issues        | <input type="checkbox"/> 1 | <input type="checkbox"/> 2       | <input type="checkbox"/> 3         | <input type="checkbox"/> 4          | <input type="checkbox"/> 5 |                            |
| Others                                                                | 1.                         | <input type="checkbox"/> 1       | <input type="checkbox"/> 2         | <input type="checkbox"/> 3          | <input type="checkbox"/> 4 | <input type="checkbox"/> 5 |
|                                                                       | 2.                         | <input type="checkbox"/> 1       | <input type="checkbox"/> 2         | <input type="checkbox"/> 3          | <input type="checkbox"/> 4 | <input type="checkbox"/> 5 |
|                                                                       | 3.                         | <input type="checkbox"/> 1       | <input type="checkbox"/> 2         | <input type="checkbox"/> 3          | <input type="checkbox"/> 4 | <input type="checkbox"/> 5 |

D3. In your clinical rotations, how frequently were the following **assessments** used to examine your clinical knowledge?

*Please tick as applicable.*

If other assessment tools are used, please specify them and rate the frequency of their use.

|                                                                              | Never                      | Rarely (<10%)              | Some rotations (10-45%)    | Most rotations (50-90%)    | Every rotation             |                            |
|------------------------------------------------------------------------------|----------------------------|----------------------------|----------------------------|----------------------------|----------------------------|----------------------------|
| Paper-based exams                                                            | <input type="checkbox"/> 1 | <input type="checkbox"/> 2 | <input type="checkbox"/> 3 | <input type="checkbox"/> 4 | <input type="checkbox"/> 5 |                            |
| Short case examinations                                                      | <input type="checkbox"/> 1 | <input type="checkbox"/> 2 | <input type="checkbox"/> 3 | <input type="checkbox"/> 4 | <input type="checkbox"/> 5 |                            |
| Long case examinations                                                       | <input type="checkbox"/> 1 | <input type="checkbox"/> 2 | <input type="checkbox"/> 3 | <input type="checkbox"/> 4 | <input type="checkbox"/> 5 |                            |
| Oral (non-patient based) examinations                                        | <input type="checkbox"/> 1 | <input type="checkbox"/> 2 | <input type="checkbox"/> 3 | <input type="checkbox"/> 4 | <input type="checkbox"/> 5 |                            |
| Objective structured clinical examinations/Multiple station assessment tasks | <input type="checkbox"/> 1 | <input type="checkbox"/> 2 | <input type="checkbox"/> 3 | <input type="checkbox"/> 4 | <input type="checkbox"/> 5 |                            |
| Continuous performance assessment                                            | <input type="checkbox"/> 1 | <input type="checkbox"/> 2 | <input type="checkbox"/> 3 | <input type="checkbox"/> 4 | <input type="checkbox"/> 5 |                            |
| Logbooks                                                                     | <input type="checkbox"/> 1 | <input type="checkbox"/> 2 | <input type="checkbox"/> 3 | <input type="checkbox"/> 4 | <input type="checkbox"/> 5 |                            |
| Portfolios                                                                   | <input type="checkbox"/> 1 | <input type="checkbox"/> 2 | <input type="checkbox"/> 3 | <input type="checkbox"/> 4 | <input type="checkbox"/> 5 |                            |
| Others                                                                       | 1.                         | <input type="checkbox"/> 1 | <input type="checkbox"/> 2 | <input type="checkbox"/> 3 | <input type="checkbox"/> 4 | <input type="checkbox"/> 5 |
|                                                                              | 2.                         | <input type="checkbox"/> 1 | <input type="checkbox"/> 2 | <input type="checkbox"/> 3 | <input type="checkbox"/> 4 | <input type="checkbox"/> 5 |
|                                                                              | 3.                         | <input type="checkbox"/> 1 | <input type="checkbox"/> 2 | <input type="checkbox"/> 3 | <input type="checkbox"/> 4 | <input type="checkbox"/> 5 |

D4. In addition to the specific questions asked above, were there any significant educational encounters that you had which made a difference to your clinical training?

type here

### END OF QUESTIONNAIRE

Thank you for participating in this study. Your contribution is most appreciated and highly valued.
